# Supplementary material for: High-contrast and fast electrochromic switching enabled by plasmonics
Source: PubMed Central journal article supplement (PMC4737852; doi:10.1038/ncomms10479), 2016-01-27
Supplement: ncomms10479-s1.pdf [file ncomms10479-s1.pdf]

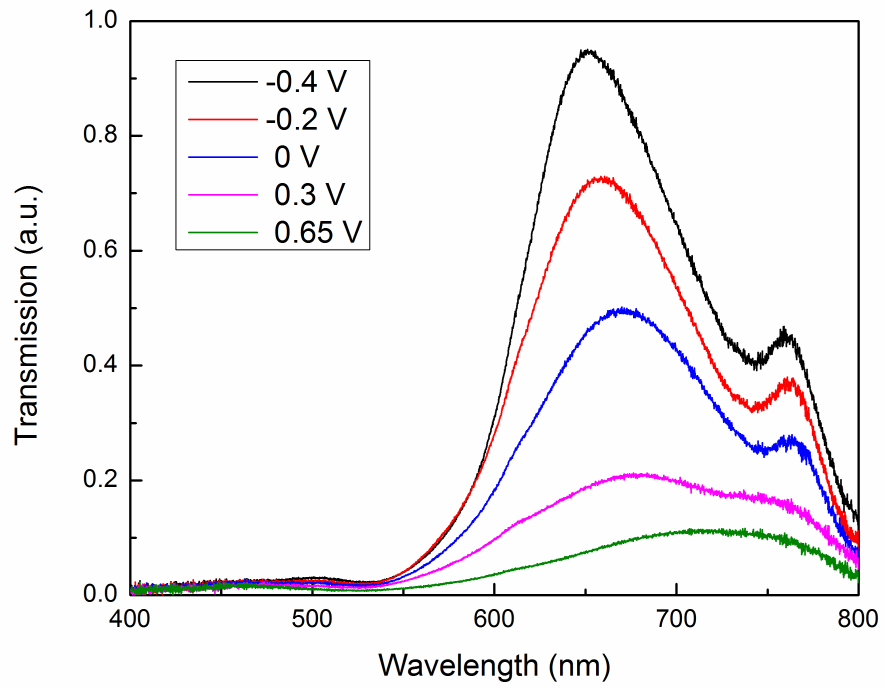

**Supplementary Figure 1.** Transmission spectrum of a 15 nm-thick PANI film deposited on the Au-nanoslit array, with external applied voltage ranging from  $-0.4$  V to  $0.65$  V.

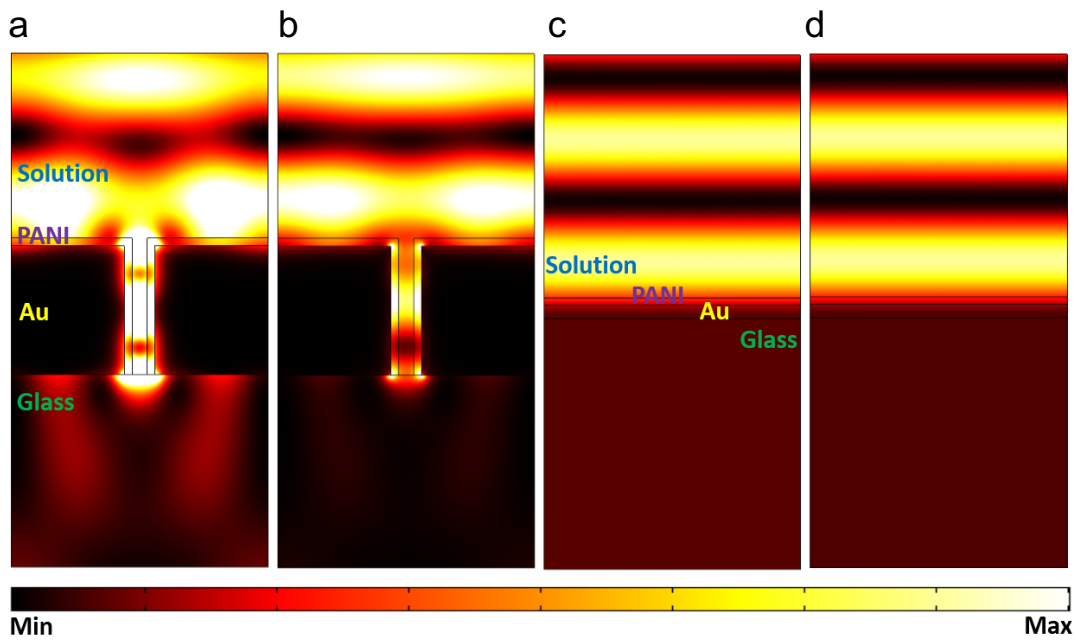

**Supplementary Figure 2.** FDTD simulated electric field intensities in the Au-nanoslit and reference flat electrochromic devices. The operation wavelength is at 632.8 nm and the PANI film thickness is 15 nm. (a) Au-nanoslit device with PANI film in reduced form; (b) Au-nanoslit device with PANI film in oxidized form; (c) Flat device with PANI film in reduced form; (d) Flat device with PANI film in oxidized form.

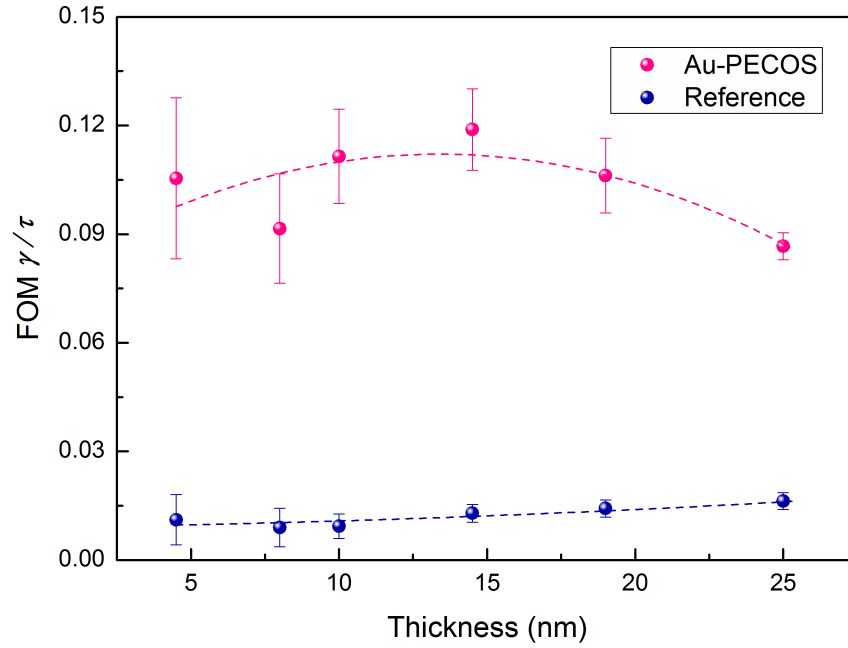

**Supplementary Figure 3.** Experimental figure of merit (FOM), defined as the ratio between switching contrast  $\gamma$  and time  $\tau$ , for both Au-nanoslit and reference planar devices. Errors, standard deviation for repeated experimental measurements. The dashed lines indicate a polynomial fit to the data.

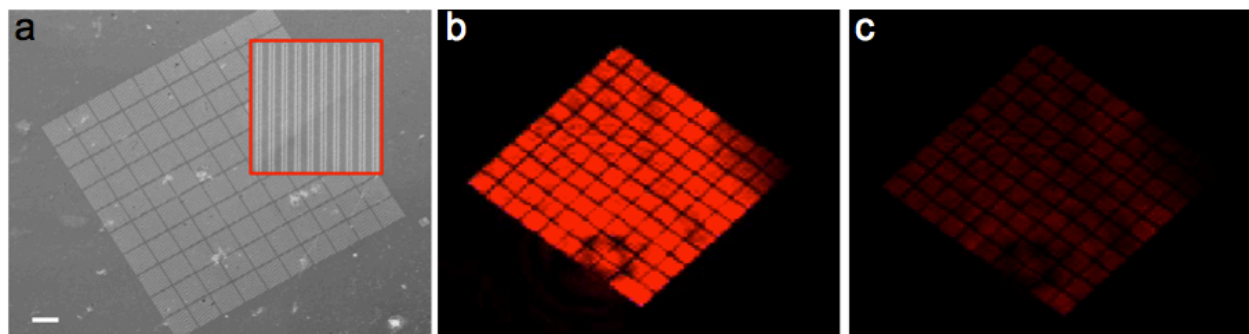

**Supplementary Figure 4.** (a) Scanning electron micrograph (SEM) image of the large-area Au-nanoslit arrays coated with a 15 nm-thick layer of PANI. Inset shows magnified SEM image. Scale bar: 10 $\mu$ m. (b) and (c) Single frame from video of light transmitted through array immersed in a solution of 0.1 M HNO<sub>3</sub> and 1 M NaNO<sub>3</sub> and illuminated at  $\lambda=633$  nm, as the electrochemical cell is switched between (b) -0.2 V and (c) 0.3 V. See video file “**Supplementary Movie 1**” for actual movie.

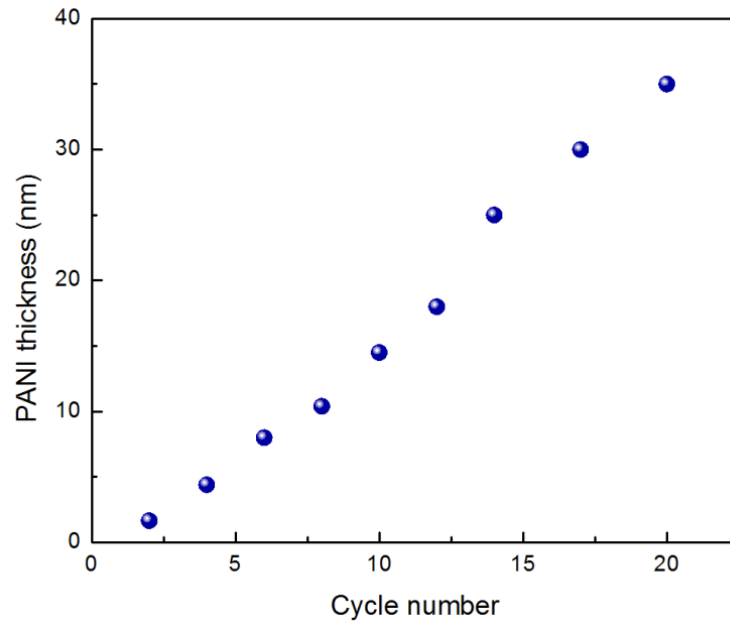

**Supplementary Figure 5.** Thickness of PANI film deposited on Au electrode as a function of potentiodynamic electrodeposition cycle number. The film thickness is characterized by atomic force microscopy (AFM).
